# Supplementary material for: Dual-barcoded shotgun expression library sequencing for high-throughput characterization of functional traits in bacteria
Source: PubMed Central journal article supplement (PMC6338753; doi:10.1038/s41467-018-08177-8), 2019-01-18
Supplement: 41467_2018_8177_MOESM13_ESM.pdf [file 41467_2018_8177_MOESM13_ESM.pdf]

## Reporting Summary

Nature Research wishes to improve the reproducibility of the work that we publish. This form provides structure for consistency and transparency in reporting. For further information on Nature Research policies, see [Authors & Referees](#) and the [Editorial Policy Checklist](#).

### Statistical parameters

When statistical analyses are reported, confirm that the following items are present in the relevant location (e.g. figure legend, table legend, main text, or Methods section).

n/a Confirmed

- The exact sample size ( $n$ ) for each experimental group/condition, given as a discrete number and unit of measurement
- An indication of whether measurements were taken from distinct samples or whether the same sample was measured repeatedly
- The statistical test(s) used AND whether they are one- or two-sided  
*Only common tests should be described solely by name; describe more complex techniques in the Methods section.*
- A description of all covariates tested
- A description of any assumptions or corrections, such as tests of normality and adjustment for multiple comparisons
- A full description of the statistics including central tendency (e.g. means) or other basic estimates (e.g. regression coefficient) AND variation (e.g. standard deviation) or associated estimates of uncertainty (e.g. confidence intervals)
- For null hypothesis testing, the test statistic (e.g.  $F$ ,  $t$ ,  $r$ ) with confidence intervals, effect sizes, degrees of freedom and  $P$  value noted  
*Give  $P$  values as exact values whenever suitable.*
- For Bayesian analysis, information on the choice of priors and Markov chain Monte Carlo settings
- For hierarchical and complex designs, identification of the appropriate level for tests and full reporting of outcomes
- Estimates of effect sizes (e.g. Cohen's  $d$ , Pearson's  $r$ ), indicating how they were calculated
- Clearly defined error bars  
*State explicitly what error bars represent (e.g. SD, SE, CI)*

*Our web collection on [statistics for biologists](#) may be useful.*

### Software and code

Policy information about [availability of computer code](#)

Data collection

Code for processing Dub-seq data is available at <https://github.com/psnovichkov/DubSeq>

Data analysis

Code for processing Dub-seq data is available at <https://github.com/psnovichkov/DubSeq>  
Also, the R code to compute the high-confidence effects is in cons.R (in <https://doi.org/10.6084/m9.figshare.6752753.v1>). The noise computation relies on the counts, which are not included in the R image. These files are in subdirectories of data/dubseq, i.e. data/dubseq/FEBA\_133/IT001.fscore.tsv

For manuscripts utilizing custom algorithms or software that are central to the research but not yet described in published literature, software must be made available to editors/reviewers upon request. We strongly encourage code deposition in a community repository (e.g. GitHub). See the Nature Research [guidelines for submitting code & software](#) for further information.

## Data

Policy information about [availability of data](#)

All manuscripts must include a [data availability statement](#). This statement should provide the following information, where applicable:

- Accession codes, unique identifiers, or web links for publicly available datasets
- A list of figures that have associated raw data
- A description of any restrictions on data availability

Complete data from all experiments (read counts per barcode, fragment scores and gene scores) is deposited here: [https://doi.org/10.6084/m9.figshare.6752753.v1]

The source data underlying Figs 2b–d, 3c-d, 4 and 5a-f and Supplementary Figs 1a-c, 2a-b, 3a-b, 5a-d and 6a-c are provided as a Source Data file.

Link to website with supplementary information and bulk data downloads: <http://genomics.lbl.gov/supplemental/dubseq18/>

## Field-specific reporting

Please select the best fit for your research. If you are not sure, read the appropriate sections before making your selection.

Life sciences       Behavioural & social sciences       Ecological, evolutionary & environmental sciences

For a reference copy of the document with all sections, see [nature.com/authors/policies/ReportingSummary-flat.pdf](https://www.nature.com/authors/policies/ReportingSummary-flat.pdf)

## Life sciences study design

All studies must disclose on these points even when the disclosure is negative.

|                 |                                                                                                                                                                 |
|-----------------|-----------------------------------------------------------------------------------------------------------------------------------------------------------------|
| Sample size     | <input type="text" value="Not applicable."/>                                                                                                                    |
| Data exclusions | <input type="text" value="None."/>                                                                                                                              |
| Replication     | <input type="text" value="Some of the DubSeq assays had exact replicates. For mutant phenotypes in growth curves, all effects were confirmed on another day."/> |
| Randomization   | <input type="text" value="Not applicable."/>                                                                                                                    |
| Blinding        | <input type="text" value="Not relevant (data collection was automated)."/>                                                                                      |

## Reporting for specific materials, systems and methods

### Materials & experimental systems

|                                     |                                     |                             |
|-------------------------------------|-------------------------------------|-----------------------------|
| n/a                                 | <input type="checkbox"/>            | Involvement in the study    |
| <input type="checkbox"/>            | <input checked="" type="checkbox"/> | Unique biological materials |
| <input checked="" type="checkbox"/> | <input type="checkbox"/>            | Antibodies                  |
| <input checked="" type="checkbox"/> | <input type="checkbox"/>            | Eukaryotic cell lines       |
| <input checked="" type="checkbox"/> | <input type="checkbox"/>            | Palaeontology               |
| <input checked="" type="checkbox"/> | <input type="checkbox"/>            | Animals and other organisms |
| <input checked="" type="checkbox"/> | <input type="checkbox"/>            | Human research participants |

### Methods

|                                     |                          |                          |
|-------------------------------------|--------------------------|--------------------------|
| n/a                                 | <input type="checkbox"/> | Involvement in the study |
| <input checked="" type="checkbox"/> | <input type="checkbox"/> | ChIP-seq                 |
| <input checked="" type="checkbox"/> | <input type="checkbox"/> | Flow cytometry           |
| <input checked="" type="checkbox"/> | <input type="checkbox"/> | MRI-based neuroimaging   |

## Unique biological materials

Policy information about [availability of materials](#)

Obtaining unique materials
